# Supplementary material for: SPTSSA Is a Prognostic Marker for Glioblastoma Associated with Tumor‐Infiltrating Immune Cells and Oxidative Stress
Source: Hindawi journal article supplement (doi:10.1155/2022/6711085), 2022-01-01

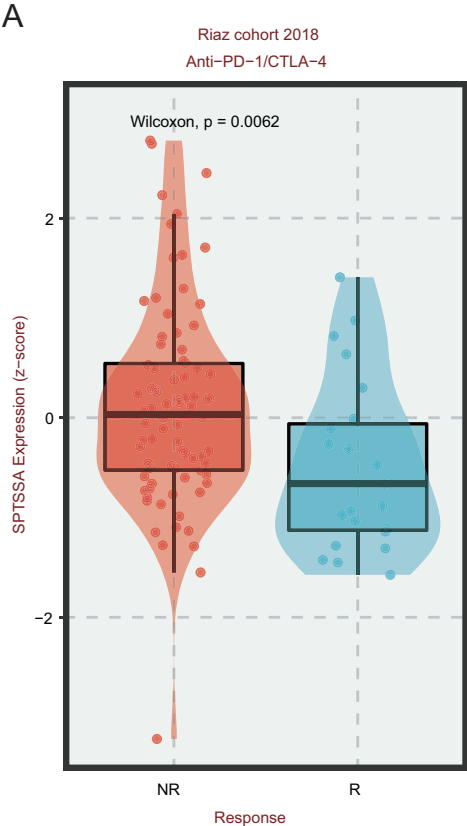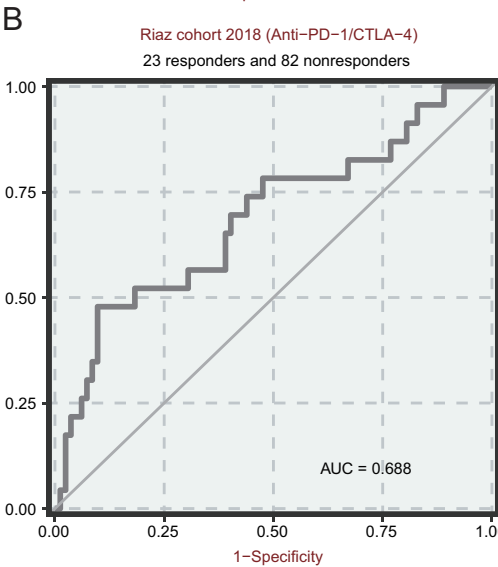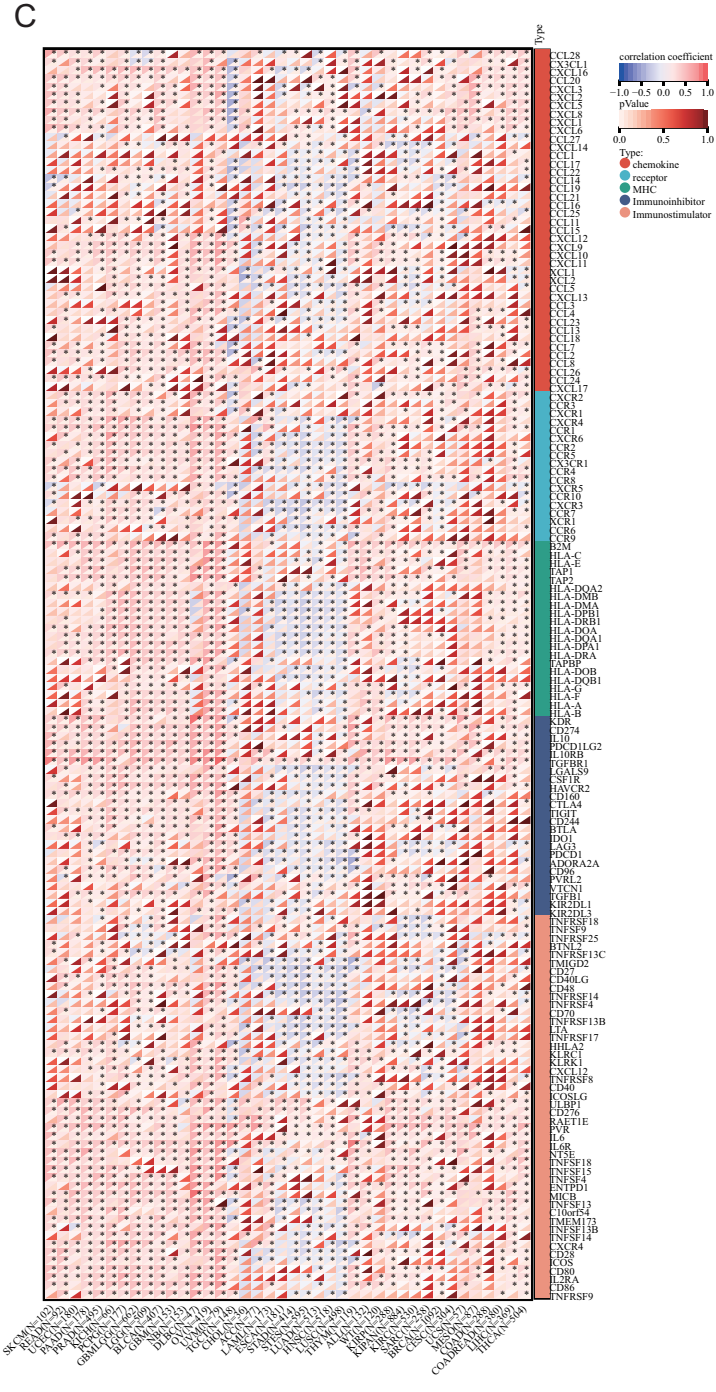

Supplement: f3 [file 6711085.f3.pdf]
